# Supplementary material
Source: PubMed Central journal article supplement (PMC2643060)
Supplement: NIHMS70273-supplement-01.pdf [file NIHMS70273-supplement-01.pdf]

## Supplemental Data

### Postmitotic Nkx2-1 Controls the Migration of Telencephalic Interneurons by Direct Repression of Guidance Receptors

Sandrina Nóbrega-Pereira, Nicoletta Kessaris, Tonggong Du, Shioko Kimura, Stewart A. Anderson, and Oscar Marín

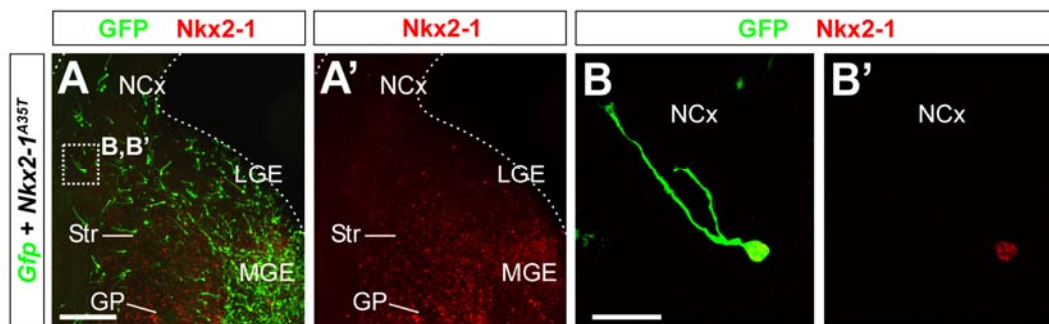

Figure S1. MGE-Derived Cells Electroporated with *Gfp* and *Nkx2-1<sup>A35T</sup>* Migrate to the Cortex and Express Nkx2-1 Protein

(A and A') Expression of GFP and Nkx2-1, respectively, in MGE-derived cells electroporated with *Gfp* + *Nkx2-1<sup>A35T</sup>* in organotypic slices. Dotted lines indicate the limits of the section.

(B and B') Higher magnification of the area boxed in (A) showing a cell derived from the MGE and electroporated with *Gfp* and *Nkx2-1<sup>A35T</sup>*. This cell is entering the cortex and expresses a form of Nkx2-1 that is recognized by the polyclonal antibody raised against this protein.

GP, globus pallidus; LGE, lateral ganglionic eminence; MGE, medial ganglionic eminence; NCx, neocortex; Str, striatum.

Scale bars equal 200  $\mu\text{m}$  (A and A') and 20  $\mu\text{m}$  (B' and B').

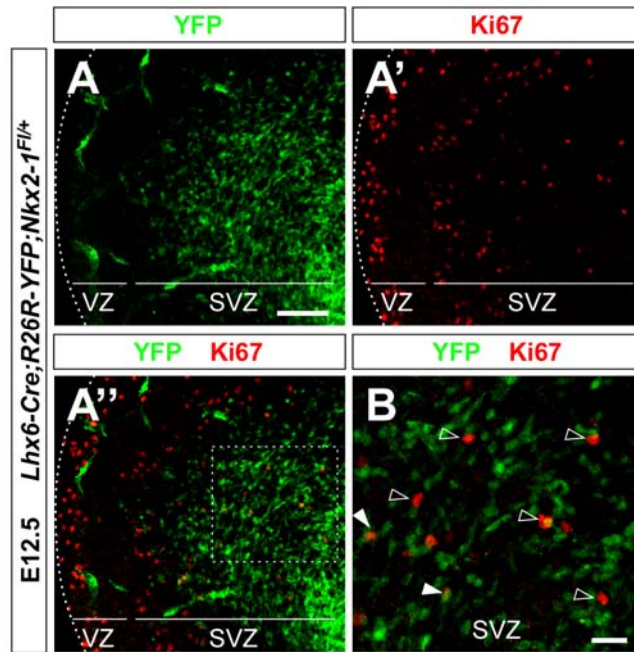

Figure S2. Recombination Driven by the *Lhx6-Cre* Transgenic Line Is Restricted Almost Exclusively to Postmitotic Cells

(A–A'') Coronal sections through the MGE of an E12.5 *Lhx6-Cre; Nkx2-1<sup>Fl/+</sup>; Rosa-YFP* embryo showing that almost all YFP-expressing cells are located in the subventricular zone and do not co-label for the progenitor marker Ki67. YFP is also detected in scattered blood vessels, as previously reported (Fogarty et al., 2007).

(B) Higher magnification of the area boxed in (A'') depicting YFP-expressing cells that are negative (open arrowhead) or positive (white arrowhead) for Ki67 expression. VZ, ventricular zone; SVZ, subventricular zone.

Scale bars equal 50  $\mu\text{m}$  (A, A' and A'') and 20  $\mu\text{m}$  (B).

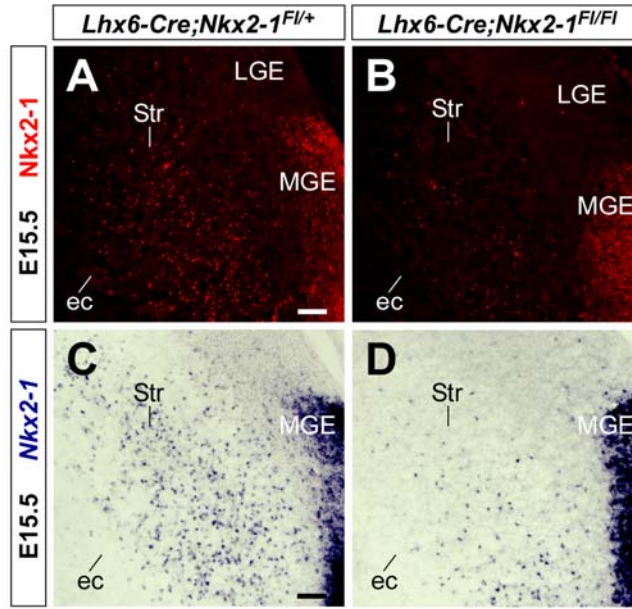

Figure S3. Nkx2-1 Expression in Control and *Lhx6-Cre;Nkx2-1<sup>F/FI</sup>* Mutant Embryos

(A–D) Coronal sections through the telencephalon of E15.5 control (A and C) and *Lhx6-Cre;Nkx2-1<sup>F/FI</sup>* mutant (B and D) embryos showing Nkx2-1 protein (A and B) and mRNA (C and D) expression.

ec, external capsule; LGE, lateral ganglionic eminence; MGE, medial ganglionic eminence; Str, striatum.

Scale bar equals 100  $\mu$ m.

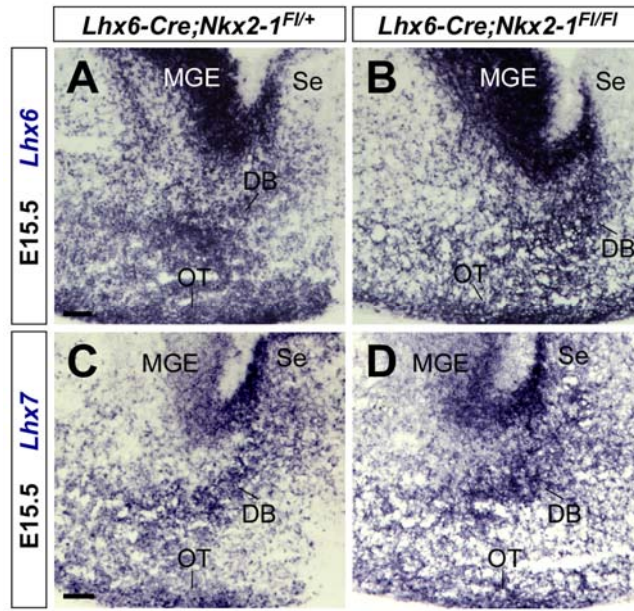

Figure S4. *Lhx6* and *Lhx7* mRNA Expression Is Unchanged in the Ventral Telencephalon of *Lhx6-Cre;Nkx2-1<sup>F/FI</sup>* Mutant Embryos

(A–D) Coronal sections through the telencephalon of E15.5 control (A and C) and *Lhx6-Cre;Nkx2-1<sup>F/FI</sup>* mutant (B and D) embryos showing *Lhx6* (A and B) and *Lhx7* (C and D) mRNA expression.

DB, diagonal band; MGE, medial ganglionic eminence; Se, septum; OT, olfactory tubercle. Scale bar equals 100  $\mu\text{m}$ .

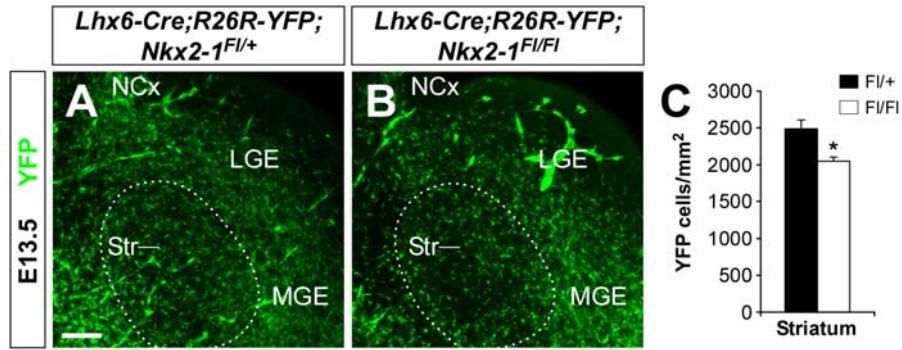

Figure S5. Tracing Experiments Reveal a Reduction in the Number of Interneurons that Invade the Embryonic Striatum upon Loss of *Nkx2-1* Function

(A and B) Coronal sections through the telencephalon of E13.5 *Lhx6-Cre;Nkx2-1<sup>F/+</sup>;Rosa-YFP* control (A) and *Lhx6-Cre;Nkx2-1<sup>F/FI</sup>;Rosa-YFP* mutant (B) embryos showing YFP expression. Dotted lines indicate the limits of the developing striatum. YFP is also detected in scattered blood vessels, as previously reported (Fogarty et al., 2007).

(C) Quantification of the number of YFP-expressing cells in the striatum of E13.5 *Lhx6-Cre;Nkx2-1<sup>F/+</sup>;Rosa-YFP* control and *Lhx6-Cre;Nkx2-1<sup>F/FI</sup>;Rosa-YFP* mutant embryos. Histograms show average  $\pm$  s.e.m. 2488.03  $\pm$  134.24 (YFP control); 2043.78  $\pm$  55.54 (YFP mutant). \* *p* < 0.05, *t*-test.

LGE, lateral ganglionic eminence; MGE, medial ganglionic eminence; NCx, neocortex; Str, striatum.

Scale bar equals 100  $\mu$ m.

*Mus musculus Neuropilin2* putative promoter regions

***Nrp2-region2***

(chr1: 62.617.785) 5' - ***cttgccaggggtgtatgaggatta***attaatgittgtaaagtgttgaat  
***tccactgaagaa***atgtacctgtcgatgcaaattattatcattatagtccttcatcccagaatctc  
aaagtgtctcccaacaattaattaagcctcactaccccctgtgagagagtaagcatcactctgccct  
cactaatacaggcagcatctgcacctgagtcacagagtctaagttaaata***cactcaggaggagtg***  
agactc***cattagcaaccatccctaagtgt*** - 3' (chr1: 62.618.074)

***Nrp2-region1***

(chr1: 62.638.833) 5' - ***ccggaggggagggcagagg***agggcgagca  
aggcaccagcctgcagccgccccggcacat***cctctgaagca***cagacactcggccggcgctggggcgag  
gtggaggtgagggcgggcgccagcgaactcggagagccgctgcacactcgggggatcccagccg  
caccgcagcaacaccagcagcaccggccgagcagcttctgcctgcact***ccctccagag***actggcc  
aagcgg***gtgtaaccgccccggga*** - 3' (chr1: 62.639.092)

Figure S6. Putative Promoter Regions for *Mus musculus Neuropilin-2*

*Nrp2* regulatory sequences (Genbank AF022855), designated *Nrp2-region2* (chr1: 62.617.785-62.618.074) and *Nrp2-region1* (chr1: 62.638.833- 62.639.09), containing Nkx2-1 consensus sequences (red letters in bold and italic for 8/9 base pairs sequences and black letters in bold and italic for a 6 base sequence). The oligonucleotide primers used for PCR detection of the ChIP assays are shown in bold and underlined.

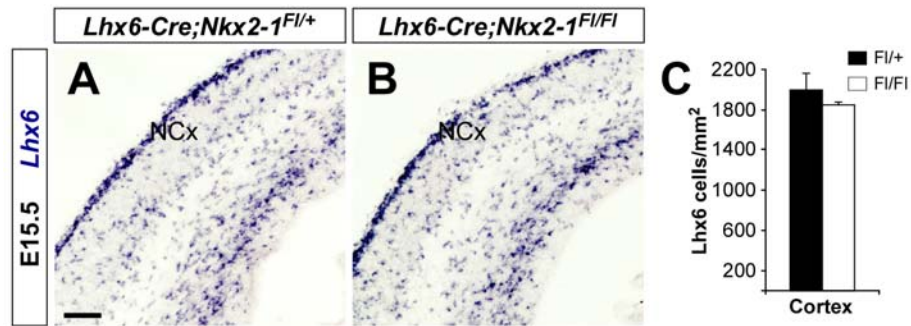

Figure S7. *Lhx6* mRNA Expression Is Unchanged in the Cortex of *Lhx6-Cre;Nkx2-1<sup>FI/FI</sup>* Mutant Embryos

(A and B) Coronal sections through the telencephalon of E15.5 control (A) and *Lhx6-Cre;Nkx2-1<sup>FI/FI</sup>* mutant (B) embryos showing *Lhx6* mRNA expression.

(C) Quantification of the number of *Lhx6*-expressing cells in the cortex of E15.5 control and *Lhx6-Cre;Nkx2-1<sup>FI/FI</sup>* mutant embryos. Histograms show average ± s.e.m. 2004.43 ± 170.50 (*Lhx6* control); 1855.71 ± 35.33 (*Lhx6* mutant).

NCx, neocortex.

Scale bar equals 100 μm.

**Sequence (5'-3'), amplicon length, and accession number of primers**

| Primer   | Sequence                 | Amplicon | Accession number |
|----------|--------------------------|----------|------------------|
| Nkx2-1 F | CGAGCGGCATGAATATGAG      | 221      | NM_009385        |
| Nkx2-1 R | GACCTGCGTGGGTGTCAG       |          |                  |
| Nrp1 Fm  | GTGGGCTTGGGCTGAG         | 410      | NM_008737        |
| Nrp1 Rm  | CAGGCGGGCTACTTTG         |          |                  |
| Nrp1 F   | TGGGCTGTGAAGTGAA         | 383      |                  |
| Nrp1 R   | CAGGCGGGCTACTTTG         |          |                  |
| Nrp1 Fq  | GGGCTGAGGATGGAGCTACTGG   | 106      |                  |
| Nrp1 Rq  | AGTTGGCCTGGTTCGTCTCACACT |          |                  |
| Nrp2 Fm  | CTCCGCACGTACTATTTGAT     | 725      | NM_010939        |
| Nrp2 Rm  | TGACCCCTTTCACTGTCTTG     |          |                  |
| Nrp2 F   | CCGAGGTGGTGCTAAACAAG     | 279      |                  |
| Nrp2 R   | CTGGCTGGGCTTGAGGGTTC     |          |                  |
| Nrp2 Fq  | CCACTGCTGACTCGGTTTCATC   | 109      |                  |
| Nrp2 Rq  | TGTTGGAGCAGGGTGCATCT     |          |                  |
| PlxA3 F  | TGGAGGCACTCGGCTTA        | 172      | NM_008883        |
| PlxA3 R  | GATGGCAAGGGTGATAGGG      |          |                  |
| PlxA4 F  | GAAGCCCAACCGAGGAC        | 264      | NM_175750        |
| PlxA4 R  | GGTTCAATCCGCACAATG       |          |                  |
| Gad67 F  | CCGCCTCCAGCTGACATC       | 439      | Z49976           |
| Gad67 R  | CCATCCGCCCTGTAGTTGCT     |          |                  |
| Lhx6 F   | CACGGCTACATTGAGAGTCA     | 408/306  | AJ000337         |
| Lhx6 R   | GACAGGCTGCTTGTTCAT       |          |                  |
| GAPDH Fm | CAGCCTCGTCCCGTAGA        | 382      | NM_008084        |
| GAPDH Rm | GGAGATGATGACCCTTTTC      |          |                  |
| GAPDH F  | AAAATGGTGAAGTTCGGTGT     | 265      |                  |
| GAPDH R  | CTCACCCATTTGATGTTAG      |          |                  |
| GAPDH Fq | CGGTGCTGAGTATGTCGTGGAGT  | 143      |                  |
| GAPDH Rq | CGTGGTTCACACCCATCACAAA   |          |                  |

F, Forward; R, Reverse; m, multiplex; q, quantitative RT-PCR

Figure S8. List of Primers Used in Semi-quantitative and Quantitative RT-PCR Experiments

**Supplemental References**

Fogarty, M., Grist, M., Gelman, D., Marín, O., Pachnis, V., and Kessar, N. (2007). Spatial genetic patterning of the embryonic neuroepithelium generates GABAergic interneuron diversity in the adult cortex. *J. Neurosci.* 27, 10935–10946.
